# Supplementary material for: Blood cells and hematological parameters of the mountain dragon, Diploderma micangshanensis (Squamata: Lacertilia: Agamidae)
Source: PeerJ. 2021 Oct 26;9:e12397. doi: 10.7717/peerj.12397 (PMC8555497; doi:10.7717/peerj.12397)
Supplement: Supplemental Information 1 — All specimen information and erythocyte morphmetry and hematological parameters of each specimens. [file peerj-09-12397-s001.xls]

## Sheet: hematological indexes
The raw data of Diploderma micangshanensis
specmens numbers	sex	body mass （g）	SVL	Hemoglobin (g/dl)	Hct (%)	Erythrocyte count (105/mm3)	Leukocyte count (104/mm3)	MCV (102/fl)	MCH (pg)	MCHC (%)	Nucleus length (NL, μm)	Nucleus width (NW, μm)	Erythrocyte length (EL,μm)	Erythrocyte width (EW, μm)	Erythrocyte area (EA, μm2)	Nucleus area (NA, μm2)
1	1	6.17	54.4	4	27.6042	3.7	2.5073	7.4606	10.8108	14.4905	8.8916	4.1256	19.9342	11.3058	176.917	28.7963
2	2	9.45	62.28	5.5	30.3095	5.38333	5.00306	5.63024	10.2167	18.1461	8.086	4.3602	17.941	9.8104	138.167	27.6764
3	1	9.42	62.42	5	20.1905	4.2	2.01306	4.80726	11.9048	24.7642	8.2598	4.0828	18.7838	10.34	152.466	26.4726
4	1	8.59	61.52	5	27.2791	5.53333	2.94366	4.92995	9.03614	18.3291	8.0926	4.1046	19.9162	11.1918	174.975	26.0753
5	1	8.75	63.27	6.16667	28.6667	6.26667	2.61801	4.57447	9.84043	21.5116	7.8822	4.1842	18.7696	9.8878	145.688	25.8899
6	2	9.26	60.19	5	28.1314	6	3.96317	4.68857	8.33333	17.7737	7.8758	4.0942	19.95	11.9868	187.722	25.3124
7	2	8.72	61.95	5.66667	29.0609	4.88333	3.86182	5.95105	11.6041	19.4992	7.9746	4.0116	18.7948	10.1338	149.513	25.1129
8	2	9.07	63.95	5.66667	32.9749	4.13333	2.80133	7.9778	13.7097	17.1848	8.3902	3.8068	19.3016	9.667	146.472	25.0728
9	1	8.9	64.8	4.25	24.3873	4.63333	2.15267	5.26344	9.17266	17.4271	7.7948	4.0816	19.1572	10.0134	150.586	24.975
10	1	10.71	65.68	5.83333	39.0741	5.58333	3.26505	6.99834	10.4478	14.9289	8.0612	3.9186	19.1304	10.99	165.041	24.7971
11	2	8.16	59.25	5.16667	26.3393	5.13333	3.63433	5.13103	10.0649	19.6158	8.0326	3.9154	19.0304	9.6316	143.885	24.6889
12	2	4.81	52.56	3.33333	23.7535	3.2	1.63988	7.42297	10.4167	14.033	7.9166	3.9152	17.9222	10.6286	149.533	24.3311
13	2	9.78	63.09	5.5	34.5117	6.76667	2.9073	5.10025	8.12808	15.9366	7.7866	3.9298	18.592	9.9918	145.828	24.0208
14	2	8.39	59.91	6	32.4847	5.33333	4.15948	6.09088	11.25	18.4702	8.1178	3.7296	18.9868	10.3442	154.177	23.7668
15	2	8.5	61.46	4	22.1308	5.125	1.90926	4.31821	7.80488	18.0743	7.9682	3.7994	19.1922	11.5586	174.14	23.7654
16	2	4.95	51.97	4.5	21.5278	3.15	1.65844	6.83422	14.2857	20.9032	7.8456	3.787	19.0476	10.8422	162.117	23.3234
17	2	8.09	58.7	4.16667	19.5598	4.98333	4.60163	3.92504	8.3612	21.3022	7.8534	3.7502	17.4338	9.3128	127.451	23.1197
18	2	8.04	61.68	4.33333	35.2941	4.38	1.41407	8.05802	9.89346	12.2778	7.8066	3.7522	19.6626	10.8652	167.706	22.9942
19	1	7.55	59.96	5	26.5977	5.32	2.09987	4.99958	9.3985	18.7986	7.6374	3.817	18.899	10.5924	157.146	22.8843
20	1	4.97	51.48	4.5	28.8174	5.2	3.26187	5.54181	8.65385	15.6156	7.6366	3.8162	18.9598	10.0616	149.751	22.8771
21	2	8.75	61.31	5.16667	28.5833	4.5	3.18427	6.35185	11.4815	18.0758	7.8908	3.6464	19.1362	10.3962	156.171	22.5868
22	2	8.28	61.94	7	27.5617	6.075	3.09848	4.53691	11.5226	25.3975	8.1488	3.5078	19.559	10.8158	166.064	22.4387
23	2	9.18	61.26	5.66667	35.0659	6.425	4.48191	5.45773	8.81971	16.1601	7.6472	3.715	17.3324	9.3646	127.414	22.3013
24	2	5.04	53.73	5.5	34.9065	4.025	1.49208	8.67243	13.6646	15.7564	7.6536	3.6792	18.6348	9.8	143.358	22.1049
25	2	8.29	60.98	6.5	32.8139	4.61667	4.39131	7.10769	14.0794	19.8087	7.6862	3.573	18.6488	10.3502	151.52	21.5583
26	2	8.53	62.46	5.66667	31.4387	5.55	2.23658	5.66464	10.2102	18.0245	7.6124	3.5892	19.428	10.053	153.318	21.4481
27	2	8.91	60.49	6	41.8819	4.8	2.40275	8.72539	12.5	14.326	7.5264	3.6118	18.1692	10.3202	147.195	21.3393
28	2	4.66	50.7	5	36.0854	7.4	5.59628	4.87641	6.75676	13.856	7.2806	3.719	18.8998	10.5778	156.936	21.2551
29	1	4.26	49.47	5	27.1209	3.96667	1.56381	6.83721	12.605	18.4359	7.4762	3.5794	18.561	10.3862	151.331	21.0068
30	1	6.65	54.97	4.33333	28.4527	4.46	3.41243	6.37953	9.71599	15.23	8.163	3.2224	19.1874	9.9846	150.389	20.649
31	2	10.13	63.82	5.16667	24.2261	5.5	2.08328	4.40475	9.39394	21.3268	6.984	3.708	18.2504	10.8456	155.38	20.3289
32	2	9.89	64.45	4.5	24.5303	4.2	2.00061	5.84055	10.7143	18.3446	7.5448	3.4282	19.006	9.8996	147.699	20.3041
33	2	8.81	62.82	5	27.8583	6.15	6.48981	4.5298	8.13008	17.948	7.1902	3.5406	18.0524	9.2944	131.712	19.9842
34	2	8.83	62.35	5.5	31.8342	5.51667	2.52172	5.77055	9.96979	17.277	7.5382	3.3732	19.1228	10.4944	157.536	19.9609
35	1	8.64	63.96	4.66667	22.3605	5.33333	5.61483	4.1926	8.75	20.8701	7.1552	3.4916	20.0964	11.1956	176.618	19.6117
36	1	6.46	56.03	4.5	28.8326	5.925	4.16928	4.86626	7.59494	15.6073	7.021	3.5494	19.842	11.481	178.828	19.5625
37	1	5.9	54.37	5.43333	28.6039	5.9	2.48663	4.84812	9.20904	18.9951	7.657	3.1832	18.2644	9.8122	140.683	19.1334
38	1	8.57	60.24	5.16667	22.6667	5.41667	2.16319	4.18463	9.53846	22.794	6.7416	3.6006	19.5512	11.7004	179.574	19.0549
39	1	6.56	55.91	3.83333	29.2424	4.53333	4.42905	6.45053	8.45588	13.1088	7.0054	3.3846	17.7678	10.184	142.044	18.6127
40	2	4.06	51.28	4.5	33.9782	5.25	3.33863	6.47203	8.57143	13.2438	7.1382	3.3148	18.019	9.5398	134.94	18.5744
41	2	8.79	63.3	6.5	34.266	5.73333	3.02753	5.97663	11.3372	18.9692	7.1668	3.2972	18.9856	9.6988	144.548	18.5498
42	2	8.55	59.41	6.33333	43.3036	7.26	5.2331	5.96468	8.7236	14.6254	6.9246	3.3062	18.4678	10.4106	150.925	17.9719
43	1	8.52	61.74	6	24	5.825	2.24297	4.12017	10.3004	25	6.8796	3.3102	19.0374	10.0998	150.935	17.8767
44	2	9.75	60.33	4.75	28.2857	5.65	1.75542	5.00632	8.40708	16.7929	7.0042	3.2466	19.394	10.6072	161.487	17.8508
45	2	4.61	52.09	5	29.7449	4.75	2.82131	6.26209	10.5263	16.8096	6.762	3.2774	18.6524	9.8146	143.707	17.397
46	2	8.27	61.19	5.33333	27.3199	6.36667	2.73147	4.29108	8.37696	19.5218	6.9254	3.1652	17.9482	8.942	125.987	17.2074
47	2	7.66	59.93	6.5	32.8291	6.65	2.98361	4.93671	9.77444	19.7995	6.4038	3.2242	18.3648	9.5788	138.092	16.208
48	2	4.62	51.59	5.5	40.1301	6.5	5.67064	6.17386	8.46154	13.7054	6.8822	2.9884	18.8048	9.7784	144.346	16.1449
